# Supplementary material for: DeepPMD: A Comprehensive Deep Learning Framework for Primary-Metastatic Classification and Origin Prediction in Lung Adenocarcinoma – Multi-Center Whole Slide Image Validation
Source: Research Square preprint supplement (doi:10.21203/rs.3.rs-7819870/v1), 2025-11-04
Supplement: Supplementary file 1 [file 733656794da08515e8adc356.pdf]

## Supplementary Methods

### WSI Preprocessing and Feature Extraction

During WSI preprocessing, tissue regions were first segmented from the background on low-resolution slides. These regions were then tiled into  $512 \times 512$  pixel patches at  $20\times$  magnification. Patches with minimal tissue content were discarded. The remaining patches were resized to  $224 \times 224$  pixels and underwent standard color normalization to mitigate staining variations across different centers and scanners.

For feature extraction, we selected the H-optimus-1 model, a Vision Transformer (ViT-G/14) foundation model pre-trained on approximately one million WSIs. Its pre-trained encoder was utilized to generate a 1024-dimensional feature vector for each tissue patch, effectively converting each WSI into a bag of feature instances.

### DeepPMD Model Architecture

To enhance classification performance, we integrated patch-level features with patient-level clinicopathological data (gender and age) to create multimodal inputs. Our classification framework, DeepPMD, implements an attention-based multi-task aggregator. This aggregator first projects the 1024-dimensional feature embeddings to 384 dimensions through two fully connected layers with ReLU activation. The architecture then incorporates two parallel processing branches, each employing a gated attention mechanism: one branch is dedicated to the binary task of primary versus metastatic cancer classification, and the other is for the six-class primary site prediction. This multi-task attention pooling allows the model to dynamically weight patch features according to their diagnostic relevance for each specific task. The weighted features from each branch are aggregated into a comprehensive slide-level representation, which is then concatenated with the clinical information for the final prediction via a terminal fully connected layer.

## Supplementary Criteria

### Inclusion Criteria:

- (1) Histologically confirmed primary LUAD or metastatic lung cancer (primary site unrestricted) via surgical resection or biopsy;
- (2) Patients had not received any prior treatment before surgical resection or biopsy, including radiotherapy, chemotherapy, targeted therapy, or immunotherapy;
- (3) Availability of complete clinicopathological data, formalin-fixed and paraffin-embedded (FFPE) H&E stained slides, clinical pathological information including diagnosis, patients' basic information like gender, age, and so on.

**Exclusion Criteria:**

- (1) Inconsistent Class Representation or Insufficient Sample Size: The pathological diagnosis was a type not represented across all four cohorts.
- (2) Poor Image Quality: The WSI failed during the scanning process or was of poor quality unsuitable for diagnosis due to factors such as significant artifacts, blurring, or suboptimal staining.
- (3) Minors: Patients under the age of 18.

**Supplementary Figures**

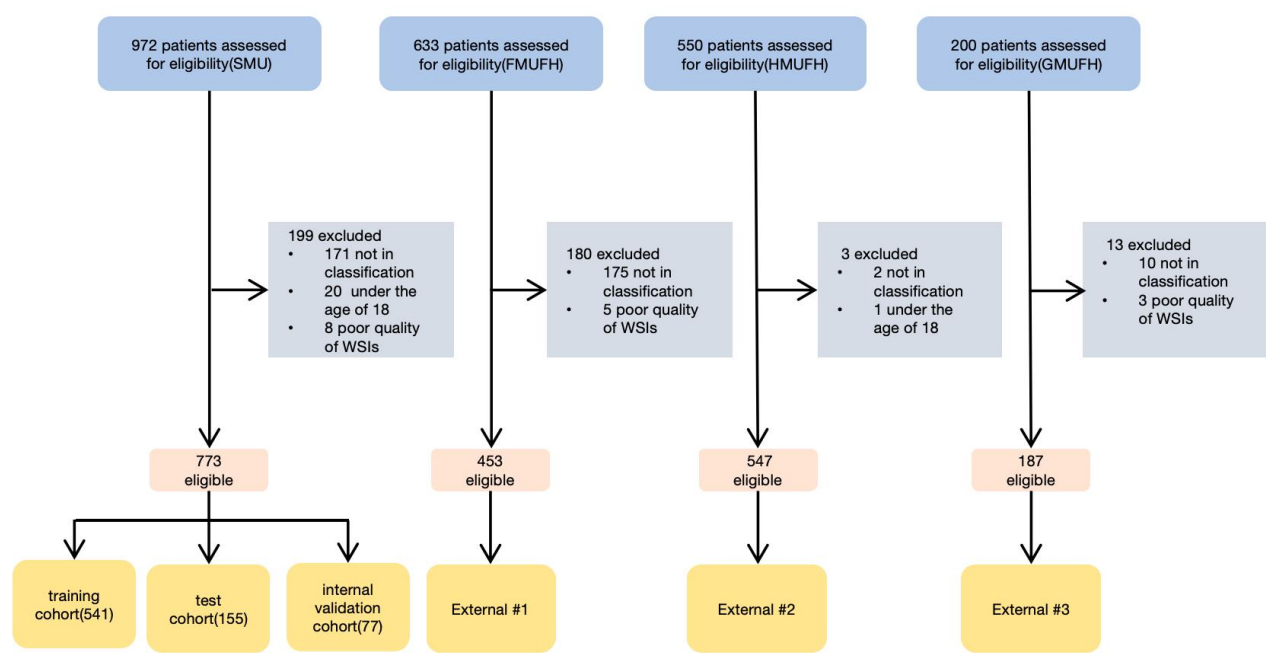

**Figure S1: Data Screening flowchart.** SMU = Southern Medical University. FMUFH = the First Affiliated Hospital of Shandong First Medical University. HMUFH = the Fourth Hospital of Hebei Medical University. GMUFH = the Sixth Affiliated Hospital of Guangzhou Medical University. WSI = whole-slide image.

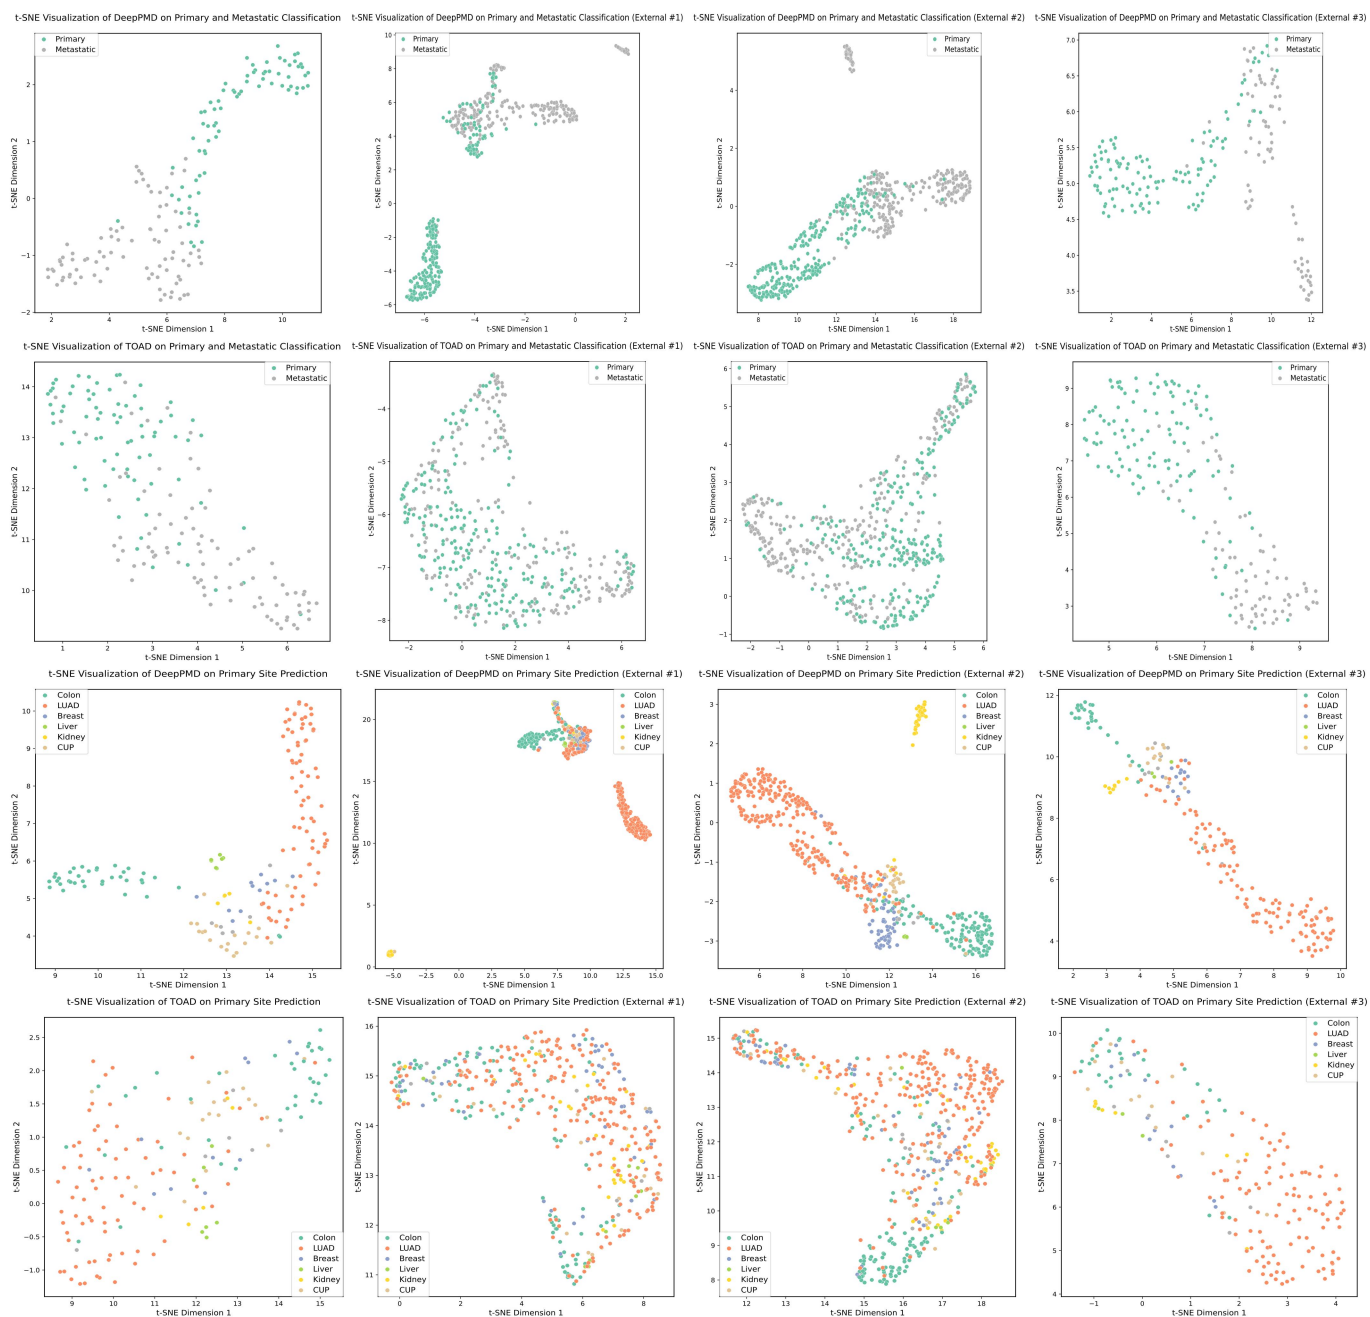

**Figure S2: Comprehensive Visualization of Feature Space Across Internal and Multiple External Test Cohorts**

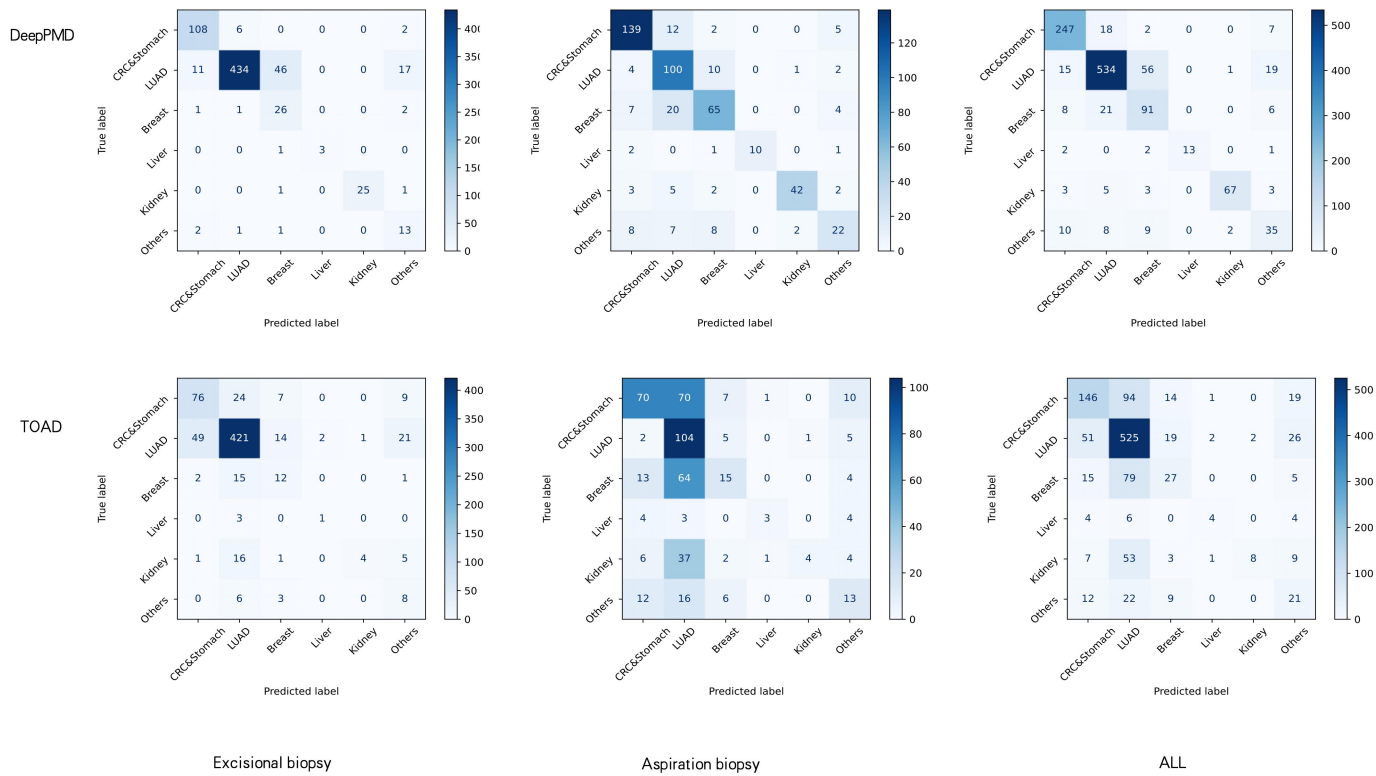

**Figure S3. Confusion matrices for DeepPMD and TOAD models on primary site prediction, stratified by biopsy type.** The performance of the DeepPMD (top row) and TOAD (bottom row) models on the six-class primary tumor site prediction task is evaluated across different sample types: excisional biopsies, aspiration biopsies, and all combined samples. The matrices demonstrate the consistently superior classification accuracy of the DeepPMD model compared to the TOAD model across all three cohorts.

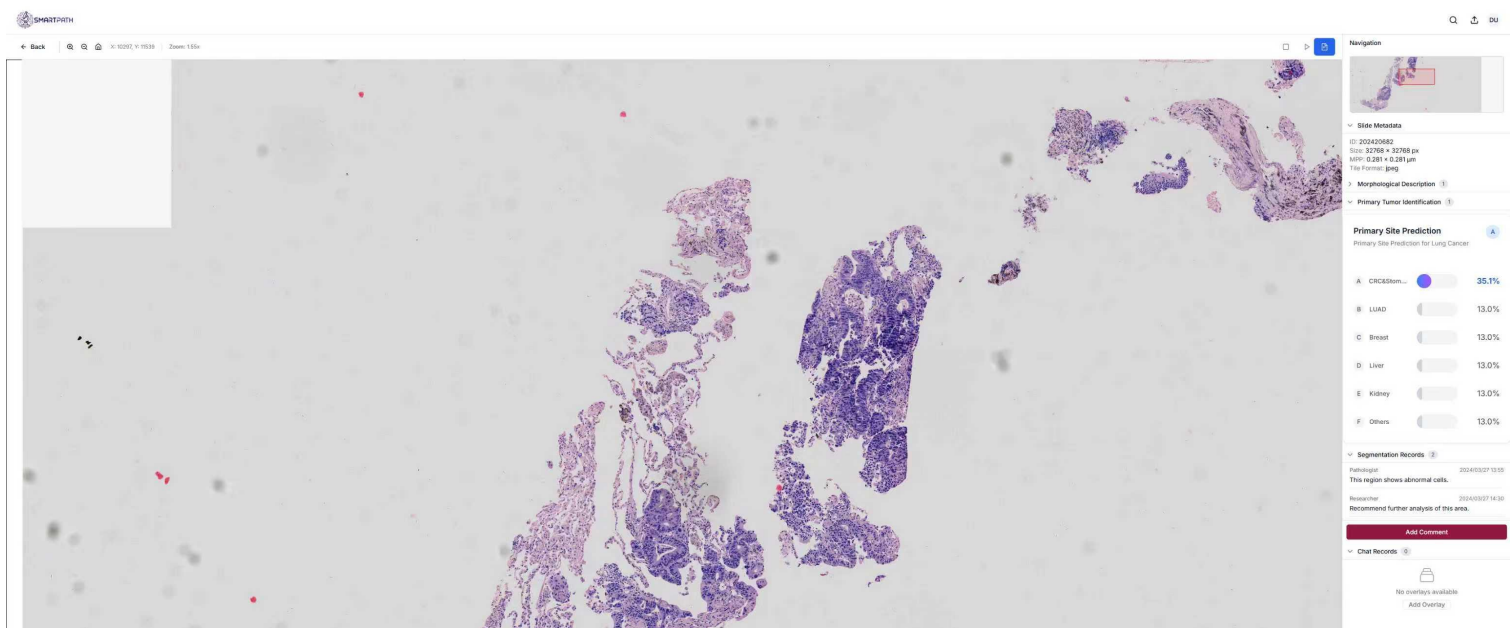

**FigureS4: Window interface diagram of the DeepPMD model system.**

Supplementary Tables

|                              | Internal set     |        | External set |        | External set #1     |        | External set #2 |        | External set #3   |        |
|------------------------------|------------------|--------|--------------|--------|---------------------|--------|-----------------|--------|-------------------|--------|
|                              | (Nanfang, n=773) |        | (n=1187)     |        | (Qianfoshan, n=453) |        | (Hebei, n=547)  |        | (Qingyuan, n=187) |        |
| Number of whole slide images | 1314             |        | 1778         |        | 453                 |        | 1007            |        | 318               |        |
| Median age, years            | 58(18-86)        |        | 61(19-86)    |        | 61(31-86)           |        | 61(19-82)       |        | 60(30-83)         |        |
| Biopsy type                  |                  |        |              |        |                     |        |                 |        |                   |        |
| Excision                     | 420              | 54.33% | 701          | 59.06% | 281                 | 62.03% | 301             | 55.03% | 119               | 63.67% |
| Aspiration                   | 353              | 45.67% | 486          | 40.94% | 172                 | 37.97% | 246             | 44.97% | 68                | 36.36% |
| Sex                          |                  |        |              |        |                     |        |                 |        |                   |        |
| Male                         | 415              | 53.69% | 611          | 51.47% | 245                 | 54.08% | 266             | 48.63% | 100               | 53.48% |
| Female                       | 358              | 46.31% | 576          | 48.53% | 208                 | 45.92% | 281             | 51.37% | 87                | 46.52% |
| Histological diagnosis       |                  |        |              |        |                     |        |                 |        |                   |        |
| Lung adenocarcinoma          | 391              | 50.58% | 625          | 52.65% | 233                 | 51.43% | 273             | 49.91% | 119               | 63.64% |
| Gastric & Colorectal Cancer  | 183              | 23.67% | 274          | 23.08% | 104                 | 22.96% | 140             | 25.59% | 30                | 16.04% |
| Breast Cancer                | 51               | 6.60%  | 126          | 10.61% | 50                  | 11.04% | 63              | 11.52% | 13                | 6.95%  |
| Renal Cancer                 | 25               | 3.23%  | 81           | 6.82%  | 30                  | 6.62%  | 43              | 7.86%  | 8                 | 4.28%  |
| Liver Cancer                 | 34               | 4.40%  | 18           | 1.52%  | 10                  | 2.21%  | 5               | 0.91%  | 3                 | 1.60%  |
| Others                       | 89               | 11.51% | 63           | 5.31%  | 26                  | 5.74%  | 23              | 4.20%  | 14                | 7.49%  |
| Scanner                      | Leica            |        |              |        | Ibingli             |        | Leica           |        | 3DHISTECH         |        |

Table S1: Baseline characteristics of participants

| Data set        | Model          | Macro-AUC<br>(95% CI)  | Macro-ACC<br>(95% CI)  | Macro-F1<br>(95% CI)    | Micro-AUC<br>(95% CI)  | Micro-ACC<br>(95% CI)  | Weighted-F1<br>(95% CI) |
|-----------------|----------------|------------------------|------------------------|-------------------------|------------------------|------------------------|-------------------------|
| Internal set    | TOAD           | 0.896<br>(0.845,0.940) | 0.828<br>(0.765,0.883) | 0.827<br>(0.765,0.883)) | 0.890<br>(0.838,0.937) | 0.828<br>(0.766,0.886) | 0.828<br>(0.766,0.886)  |
|                 | DeepPMD        | 0.993<br>(0.984,0.999) | 0.936<br>(0.894,0.970) | 0.936<br>(0.892,0.968)  | 0.992<br>(0.982,0.998) | 0.936<br>(0.892,0.968) | 0.936<br>(0.892,0.968)  |
|                 | <i>P value</i> | <i>P&lt;0.001</i>      | <i>P&lt;0.001</i>      | <i>P&lt;0.001</i>       | <i>P&lt;0.001</i>      | <i>P&lt;0.001</i>      | <i>P&lt;0.001</i>       |
| External set #1 | TOAD           | 0.648<br>(0.597,0.700) | 0.606<br>(0.561,0.652) | 0.606<br>(0.561,0.651)  | 0.645<br>(0.593,0.698) | 0.607<br>(0.561,0.653) | 0.607<br>(0.561,0.653)  |
|                 | DeepPMD        | 0.850<br>(0.813,0.884) | 0.807<br>(0.772,0.842) | 0.802<br>(0.764,0.840)  | 0.865<br>(0.831,0.898) | 0.803<br>(0.766,0.841) | 0.801<br>(0.763,0.840)  |
|                 | <i>P value</i> | <i>P&lt;0.001</i>      | <i>P&lt;0.001</i>      | <i>P&lt;0.001</i>       | <i>P&lt;0.001</i>      | <i>P&lt;0.001</i>      | <i>P&lt;0.001</i>       |
| External set #2 | TOAD           | 0.785<br>(0.746,0.824) | 0.712<br>(0.671,0.748) | 0.709<br>(0.667,0.746)  | 0.788<br>(0.749,0.826) | 0.711<br>(0.669,0.748) | 0.709<br>(0.667,0.747)  |
|                 | DeepPMD        | 0.977<br>(0.966,0.986) | 0.903<br>(0.877,0.928) | 0.903<br>(0.877,0.928)  | 0.974<br>(0.961,0.984) | 0.903<br>(0.878,0.929) | 0.903<br>(0.877,0.928)  |
|                 | <i>P value</i> | <i>P&lt;0.001</i>      | <i>P&lt;0.001</i>      | <i>P&lt;0.001</i>       | <i>P&lt;0.001</i>      | <i>P&lt;0.001</i>      | <i>P&lt;0.001</i>       |
| External set #3 | TOAD           | 0.922<br>(0.877,0.963) | 0.844<br>(0.791,0.894) | 0.823<br>(0.767,0.877)  | 0.876<br>(0.821,0.928) | 0.829<br>(0.775,0.882) | 0.832<br>(0.779,0.884)  |
|                 | DeepPMD        | 0.981<br>(0.962,0.995) | 0.918<br>(0.877,0.954) | 0.899<br>(0.850,0.943)  | 0.967<br>(0.939,0.990) | 0.904<br>(0.856,0.947) | 0.905<br>(0.859,0.947)  |
|                 | <i>P value</i> | <i>P&lt;0.001</i>      | <i>P&lt;0.001</i>      | <i>P&lt;0.001</i>       | <i>P&lt;0.001</i>      | <i>P&lt;0.001</i>      | <i>P&lt;0.001</i>       |

**Table S2: Performance of the DeepPMD and TOAD models in distinguishing primary and**

**metastatic cancer in the indicated data set.** Macro-AUC = area under the curve for each class averaged. Macro-ACC = accuracy for each class averaged. Macro-F1 = F1 score for each class averaged. Micro-AUC = area under the curve calculated globally.

Micro-ACC = accuracy calculated globally. Weighted-F1 = F1 score weighted by class sample size. CI = confidence interval.

| Data set        | Model          | Macro-AUC<br>(95% CI)  | Macro-ACC<br>(95% CI)  | Macro-F1<br>(95% CI)   | Micro-AUC<br>(95% CI)  | Micro-ACC<br>(95% CI)  | Weighted-F1<br>(95% CI) |
|-----------------|----------------|------------------------|------------------------|------------------------|------------------------|------------------------|-------------------------|
| Internal set    | TOAD           | 0.885<br>(0.838,0.928) | 0.516<br>(0.408,0.635) | 0.533<br>(0.417,0.654) | 0.918<br>(0.884,0.948) | 0.708<br>(0.633,0.778) | 0.696<br>(0.615,0.770)  |
|                 | DeepPMD        | 0.992<br>(0.985,0.998) | 0.933<br>(0.884,0.974) | 0.929<br>(0.881,0.968) | 0.995<br>(0.991,0.998) | 0.930<br>(0.886,0.968) | 0.931<br>(0.890,0.968)  |
|                 | <i>P value</i> | <i>P&lt;0.001</i>      | <i>P&lt;0.001</i>      | <i>P&lt;0.001</i>      | <i>P&lt;0.001</i>      | <i>P&lt;0.001</i>      | <i>P&lt;0.001</i>       |
| External set #1 | TOAD           | 0.719<br>(0.671,0.761) | 0.269<br>(0.232,0.307) | 0.259<br>(0.218,0.304) | 0.828<br>(0.803,0.851) | 0.537<br>(0.492,0.581) | 0.489<br>(0.438,0.537)  |
|                 | DeepPMD        | 0.914<br>(0.889,0.935) | 0.648<br>(0.575,0.716) | 0.660<br>(0.594,0.717) | 0.944<br>(0.929,0.958) | 0.741<br>(0.702,0.779) | 0.748<br>(0.708,0.786)  |
|                 | <i>P value</i> | <i>P&lt;0.001</i>      | <i>P&lt;0.001</i>      | <i>P&lt;0.001</i>      | <i>P&lt;0.001</i>      | <i>P&lt;0.001</i>      | <i>P&lt;0.001</i>       |
| External set #2 | TOAD           | 0.790<br>(0.722,0.838) | 0.457<br>(0.354,0.544) | 0.468<br>(0.369,0.546) | 0.877<br>(0.857,0.896) | 0.643<br>(0.603,0.682) | 0.616<br>(0.572,0.659)  |
|                 | DeepPMD        | 0.973<br>(0.958,0.986) | 0.864<br>(0.822,0.903) | 0.854<br>(0.818,0.890) | 0.982<br>(0.974,0.989) | 0.883<br>(0.856,0.909) | 0.885<br>(0.859,0.911)  |
|                 | <i>P value</i> | <i>P&lt;0.001</i>      | <i>P&lt;0.001</i>      | <i>P&lt;0.001</i>      | <i>P&lt;0.001</i>      | <i>P&lt;0.001</i>      | <i>P&lt;0.001</i>       |
| External set #3 | TOAD           | 0.899<br>(0.751,0.940) | 0.476<br>(0.367,0.609) | 0.429<br>(0.332,0.535) | 0.926<br>(0.897,0.951) | 0.723<br>(0.652,0.786) | 0.723<br>(0.656,0.784)  |
|                 | DeepPMD        | 0.981<br>(0.823,0.996) | 0.860<br>(0.731,0.949) | 0.827<br>(0.683,0.912) | 0.990<br>(0.982,0.996) | 0.893<br>(0.845,0.936) | 0.900<br>(0.857,0.939)  |
|                 | <i>P value</i> | <i>P&lt;0.001</i>      | <i>P&lt;0.001</i>      | <i>P&lt;0.001</i>      | <i>P&lt;0.001</i>      | <i>P&lt;0.001</i>      | <i>P&lt;0.001</i>       |

**Table S3: Performance of the DeepPMD and TOAD models in predicting primary tumor sites in the indicated data set.**

Macro-AUC = area under the curve for each class averaged. Macro-ACC = accuracy for each class averaged. Macro-F1 = F1 score for each class averaged. Micro-AUC = area under the curve calculated globally. Micro-ACC = accuracy calculated globally. Weighted-F1 = F1 score weighted by class sample size. CI = confidence interval.

| Data set             | Model          | Macro-AUC<br>(95% CI)  | Macro-ACC<br>(95% CI)  | Macro-F1<br>(95% CI)   | Micro-AUC<br>(95% CI)  | Micro-ACC<br>(95% CI)  | Weighted-F1<br>(95% CI) |
|----------------------|----------------|------------------------|------------------------|------------------------|------------------------|------------------------|-------------------------|
| Excisional<br>biopsy | TOAD           | 0.843<br>(0.814,0.870) | 0.765<br>(0.732,0.798) | 0.723<br>(0.689,0.757) | 0.791<br>(0.757,0.825) | 0.750<br>(0.719,0.781) | 0.762<br>(0.733,0.790)  |
|                      |                |                        |                        |                        |                        |                        |                         |
|                      | DeepPMD        | 0.962<br>(0.950,0.973) | 0.889<br>(0.869,0.910) | 0.837<br>(0.808,0.865) | 0.915<br>(0.892,0.936) | 0.854<br>(0.828,0.879) | 0.860<br>(0.836,0.884)  |
|                      |                |                        |                        |                        |                        |                        |                         |
|                      | <i>P value</i> | <i>P&lt;0.001</i>      | <i>P&lt;0.001</i>      | <i>P&lt;0.001</i>      | <i>P&lt;0.001</i>      | <i>P&lt;0.001</i>      | <i>P&lt;0.001</i>       |
| Aspiration<br>biopsy | TOAD           | 0.723<br>(0.673,0.770) | 0.663<br>(0.617,0.708) | 0.582<br>(0.537,0.626) | 0.702<br>(0.656,0.746) | 0.604<br>(0.560,0.646) | 0.632<br>(0.591,0.671)  |
|                      |                |                        |                        |                        |                        |                        |                         |
|                      | DeepPMD        | 0.944<br>(0.920,0.966) | 0.844<br>(0.801,0.883) | 0.841<br>(0.799,0.877) | 0.959<br>(0.941,0.973) | 0.883<br>(0.852,0.909) | 0.883<br>(0.853,0.911)  |
|                      |                |                        |                        |                        |                        |                        |                         |
|                      | <i>P value</i> | <i>P&lt;0.001</i>      | <i>P&lt;0.001</i>      | <i>P&lt;0.001</i>      | <i>P&lt;0.001</i>      | <i>P&lt;0.001</i>      | <i>P&lt;0.001</i>       |

**Table S4: Performance of DeepPMD and TOAD in distinguishing primary and metastatic cancer in the excisional biopsy and aspiration biopsy.** Macro-AUC = area under the curve for each class averaged. Macro-ACC = accuracy for each class averaged. Macro-F1 = F1 score for each class averaged. Micro-AUC = area under the curve calculated globally. Micro-ACC = accuracy calculated globally. Weighted-F1 = F1 score weighted by class sample size. CI = confidence interval.



| Data set             | Model          | Macro-AUC<br>(95% CI)  | Macro-ACC<br>(95% CI)  | Macro-F1<br>(95% CI)   | Micro-AUC<br>(95% CI)  | Micro-ACC<br>(95% CI)  | Weighted-F1<br>(95% CI) |
|----------------------|----------------|------------------------|------------------------|------------------------|------------------------|------------------------|-------------------------|
| Excisional<br>biopsy | TOAD           | 0.874<br>(0.829,0.906) | 0.457<br>(0.372,0.572) | 0.429<br>(0.346,0.519) | 0.928<br>(0.915,0.941) | 0.744<br>(0.714,0.775) | 0.749<br>(0.718,0.782)  |
|                      |                |                        |                        |                        |                        |                        |                         |
|                      | DeepPMD        | 0.974<br>(0.949,0.991) | 0.850<br>(0.747,0.925) | 0.767<br>(0.659,0.827) | 0.980<br>(0.973,0.986) | 0.868<br>(0.843,0.893) | 0.887<br>(0.867,0.908)  |
|                      |                |                        |                        |                        |                        |                        |                         |
|                      | <i>P value</i> | <i>P&lt;0.001</i>      | <i>P&lt;0.001</i>      | <i>P&lt;0.001</i>      | <i>P&lt;0.001</i>      | <i>P&lt;0.001</i>      | <i>P&lt;0.001</i>       |
| Aspiration<br>biopsy | TOAD           | 0.731<br>(0.694,0.766) | 0.342<br>(0.297,0.394) | 0.332<br>(0.275,0.394) | 0.773<br>(0.748,0.798) | 0.430<br>(0.387,0.473) | 0.391<br>(0.346,0.439)  |
|                      |                |                        |                        |                        |                        |                        |                         |
|                      | DeepPMD        | 0.935<br>(0.913,0.953) | 0.728<br>(0.670,0.781) | 0.756<br>(0.702,0.801) | 0.952<br>(0.938,0.964) | 0.777<br>(0.739,0.815) | 0.775<br>(0.735,0.812)  |
|                      |                |                        |                        |                        |                        |                        |                         |
|                      | <i>P value</i> | <i>P&lt;0.001</i>      | <i>P&lt;0.001</i>      | <i>P&lt;0.001</i>      | <i>P&lt;0.001</i>      | <i>P&lt;0.001</i>      | <i>P&lt;0.001</i>       |

**Table S5: Performance of the DeepPMD and TOAD models in predicting primary tumor**

**sites in the excisional biopsy and aspiration biopsy.** Macro-AUC = area under the curve for each class averaged. Macro-ACC = accuracy for each class averaged. Macro-F1 = F1 score for each class averaged. Micro-AUC = area under the curve calculated globally. Micro-ACC = accuracy calculated globally. Weighted-F1 = F1 score weighted by class sample size. CI = confidence interval.

| Data set                    | Model          | AUC<br>(95% CI)      | ACC<br>(95% CI)      | Weighted-F1<br>(95% CI) |
|-----------------------------|----------------|----------------------|----------------------|-------------------------|
| Lung adenocarcinoma         | TOAD           | 0.730 (0.684, 0.778) | 0.889 (0.828, 0.944) | 0.505 (0.447, 0.561)    |
|                             | DeepPMD        | 0.936 (0.907, 0.959) | 0.854 (0.787, 0.916) | 0.765 (0.703, 0.822)    |
|                             | <i>P value</i> | <i>P&lt;0.001</i>    | <i>P&lt;0.001</i>    | <i>P&lt;0.001</i>       |
| Gastric & Colorectal Cancer | TOAD           | 0.776 (0.733, 0.822) | 0.443 (0.368, 0.522) | 0.526 (0.456, 0.597)    |
|                             | DeepPMD        | 0.965 (0.947, 0.979) | 0.880 (0.824, 0.928) | 0.865 (0.822, 0.904)    |
|                             | <i>P value</i> | <i>P&lt;0.001</i>    | <i>P&lt;0.001</i>    | <i>P&lt;0.001</i>       |
| Breast Cancer               | TOAD           | 0.685 (0.627, 0.744) | 0.157 (0.090, 0.224) | 0.229 (0.137, 0.317)    |
|                             | DeepPMD        | 0.937 (0.913, 0.958) | 0.678 (0.581, 0.770) | 0.706 (0.629, 0.774)    |
|                             | <i>P value</i> | <i>P&lt;0.001</i>    | <i>P&lt;0.001</i>    | <i>P&lt;0.001</i>       |
| Renal Cancer                | TOAD           | 0.731 (0.649, 0.808) | 0.074 (0.016, 0.153) | 0.134 (0.031, 0.261)    |
|                             | DeepPMD        | 0.966 (0.924, 0.992) | 0.779 (0.660, 0.885) | 0.848 (0.761, 0.917)    |
|                             | <i>P value</i> | <i>P&lt;0.001</i>    | <i>P&lt;0.001</i>    | <i>P&lt;0.001</i>       |
| Liver Cancer                | TOAD           | 0.779 (0.620, 0.908) | 0.213 (0.000, 0.462) | 0.301 (0.000, 0.583)    |
|                             | DeepPMD        | 0.949 (0.868, 1.000) | 0.716 (0.444, 0.938) | 0.828 (0.615, 0.968)    |
|                             | <i>P value</i> | <i>P&lt;0.001</i>    | <i>P&lt;0.001</i>    | <i>P&lt;0.001</i>       |
| Others                      | TOAD           | 0.678 (0.583, 0.763) | 0.275 (0.151, 0.410) | 0.295 (0.172, 0.423)    |
|                             | DeepPMD        | 0.856 (0.787, 0.916) | 0.466 (0.320, 0.609) | 0.526 (0.388, 0.653)    |
|                             | <i>P value</i> | <i>P&lt;0.001</i>    | <i>P&lt;0.001</i>    | <i>P&lt;0.001</i>       |

**Table S6: Performance of the DeepPMD and TOAD models in predicting primary tumor sites on aspiration biopsy samples.**

AUC = area under the curve. ACC = accuracy. F1 = F1 score. CI = confidence interval.

| Data set                    | Model          | AUC<br>(95% CI)      | ACC<br>(95% CI)      | F1<br>(95% CI)       |
|-----------------------------|----------------|----------------------|----------------------|----------------------|
| Lung adenocarcinoma         | TOAD           | 0.849 (0.817, 0.879) | 0.829 (0.796, 0.861) | 0.848 (0.822, 0.871) |
|                             | DeepPMD        | 0.975 (0.964, 0.983) | 0.855 (0.825, 0.884) | 0.914 (0.896, 0.931) |
|                             | <i>P value</i> | <i>P&lt;0.001</i>    | <i>P&lt;0.001</i>    | <i>P&lt;0.001</i>    |
| Gastric & Colorectal Cancer | TOAD           | 0.896 (0.870, 0.922) | 0.654 (0.566, 0.741) | 0.621 (0.548, 0.691) |
|                             | DeepPMD        | 0.993 (0.987, 0.997) | 0.931 (0.882, 0.973) | 0.907 (0.868, 0.942) |
|                             | <i>P value</i> | <i>P&lt;0.001</i>    | <i>P&lt;0.001</i>    | <i>P&lt;0.001</i>    |
| Breast Cancer               | TOAD           | 0.843 (0.741, 0.933) | 0.399 (0.219, 0.583) | 0.354 (0.197, 0.500) |
|                             | DeepPMD        | 0.966 (0.938, 0.989) | 0.865 (0.727, 0.971) | 0.490 (0.367, 0.602) |
|                             | <i>P value</i> | <i>P&lt;0.001</i>    | <i>P&lt;0.001</i>    | <i>P&lt;0.001</i>    |
| Renal Cancer                | TOAD           | 0.895 (0.809, 0.962) | 0.149 (0.036, 0.304) | 0.245 (0.067, 0.452) |
|                             | DeepPMD        | 0.999 (0.996, 1.000) | 0.924 (0.809, 1.000) | 0.960 (0.895, 1.000) |
|                             | <i>P value</i> | <i>P&lt;0.001</i>    | <i>P&lt;0.001</i>    | <i>P&lt;0.001</i>    |
| Liver Cancer                | TOAD           | 0.937 (0.855, 0.992) | 0.253 (0.000, 0.750) | 0.268 (0.000, 0.667) |
|                             | DeepPMD        | 1.000 (1.000, 1.000) | 0.740 (0.250, 1.000) | 0.828 (0.400, 1.000) |
|                             | <i>P value</i> | <i>P&lt;0.001</i>    | <i>P&lt;0.001</i>    | <i>P&lt;0.001</i>    |
| Others                      | TOAD           | 0.846 (0.746, 0.926) | 0.472 (0.231, 0.714) | 0.259 (0.113, 0.406) |
|                             | DeepPMD        | 0.933 (0.821, 0.994) | 0.766 (0.545, 0.944) | 0.499 (0.326, 0.655) |
|                             | <i>P value</i> | <i>P&lt;0.001</i>    | <i>P&lt;0.001</i>    | <i>P&lt;0.001</i>    |

**Table S7: Performance of the DeepPMD and TOAD models in predicting primary tumor sites on excisional biopsy samples.**

AUC = area under the curve. ACC = accuracy. F1 = F1 score. CI = confidence interval.

| Data set                    | Model          | AUC<br>(95% CI)      | ACC<br>(95% CI)      | F1<br>(95% CI)       |
|-----------------------------|----------------|----------------------|----------------------|----------------------|
| Lung adenocarcinoma         | TOAD           | 0.763 (0.737, 0.789) | 0.839 (0.812, 0.868) | 0.748 (0.723, 0.773) |
|                             | DeepPMD        | 0.946 (0.934, 0.957) | 0.855 (0.826, 0.881) | 0.882 (0.863, 0.901) |
|                             | <i>P value</i> | <i>P&lt;0.001</i>    | <i>P&lt;0.001</i>    | <i>P&lt;0.001</i>    |
| Gastric & Colorectal Cancer | TOAD           | 0.837 (0.811, 0.862) | 0.533 (0.474, 0.589) | 0.573 (0.519, 0.624) |
|                             | DeepPMD        | 0.983 (0.975, 0.989) | 0.901 (0.865, 0.934) | 0.884 (0.855, 0.912) |
|                             | <i>P value</i> | <i>P&lt;0.001</i>    | <i>P&lt;0.001</i>    | <i>P&lt;0.001</i>    |
| Breast Cancer               | TOAD           | 0.704 (0.650, 0.757) | 0.215 (0.146, 0.290) | 0.272 (0.191, 0.356) |
|                             | DeepPMD        | 0.934 (0.914, 0.952) | 0.723 (0.647, 0.797) | 0.629 (0.561, 0.692) |
|                             | <i>P value</i> | <i>P&lt;0.001</i>    | <i>P&lt;0.001</i>    | <i>P&lt;0.001</i>    |
| Renal Cancer                | TOAD           | 0.762 (0.689, 0.826) | 0.098 (0.037, 0.169) | 0.174 (0.070, 0.281) |
|                             | DeepPMD        | 0.982 (0.960, 0.996) | 0.826 (0.735, 0.905) | 0.886 (0.825, 0.935) |
|                             | <i>P value</i> | <i>P&lt;0.001</i>    | <i>P&lt;0.001</i>    | <i>P&lt;0.001</i>    |
| Liver Cancer                | TOAD           | 0.798 (0.654, 0.911) | 0.218 (0.045, 0.438) | 0.294 (0.071, 0.526) |
|                             | DeepPMD        | 0.975 (0.935, 1.000) | 0.722 (0.500, 0.923) | 0.834 (0.667, 0.960) |
|                             | <i>P value</i> | <i>P&lt;0.001</i>    | <i>P&lt;0.001</i>    | <i>P&lt;0.001</i>    |
| Others                      | TOAD           | 0.737 (0.666, 0.800) | 0.329 (0.214, 0.452) | 0.282 (0.188, 0.376) |
|                             | DeepPMD        | 0.890 (0.837, 0.936) | 0.549 (0.427, 0.673) | 0.517 (0.411, 0.619) |
|                             | <i>P value</i> | <i>P&lt;0.001</i>    | <i>P&lt;0.001</i>    | <i>P&lt;0.001</i>    |

**Table S8: Performance of the DeepPMD and TOAD models in predicting primary tumor sites on all combined biopsy samples.**

AUC = area under the curve. ACC = accuracy. F1 = F1 score. CI = confidence interval.
